# Supplementary material for: Cellular immunotherapy using irradiated lung cancer cell vaccine co-expressing GM-CSF and IL-18 can induce significant antitumor effects
Source: PubMed Central journal article supplement (PMC3922726; doi:10.1186/1471-2407-14-48), 2014-01-29

## Supplemental Data

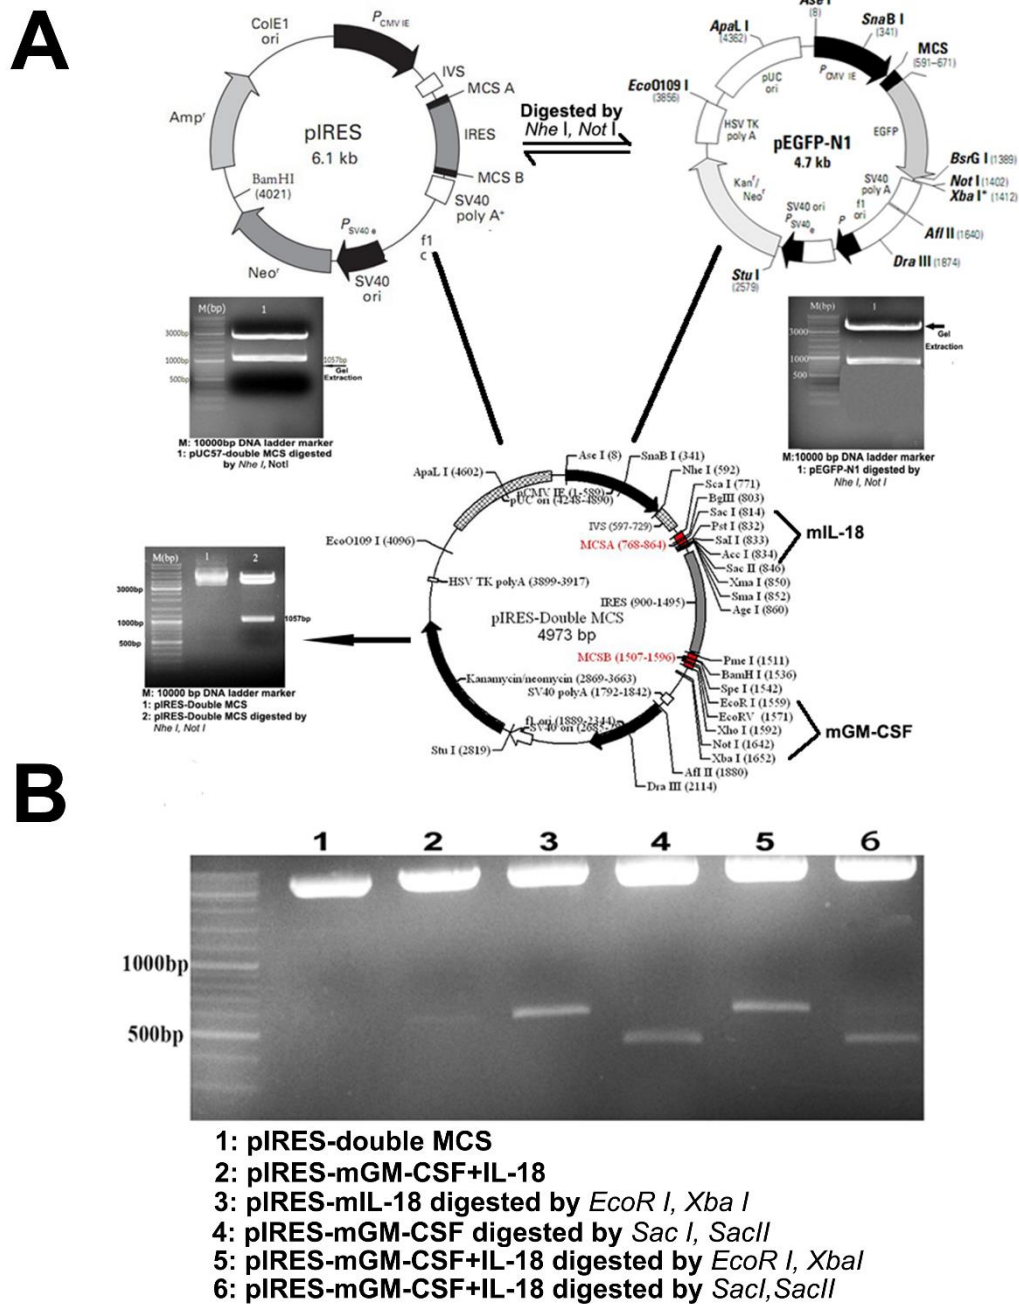

**Figure S1. Construction of pIRES-double MCS vector and Verification of pIRES-mGM-CSF+IL-18 plasmid**

In order to reform an eukaryotic expression vector with characteristics of double cloning sites, easy transfection and resistance selection. We synthesized multiple cloning sites (MCS) sequence from pIRES empty plasmid and introduced *NheI*, *NotI* restriction

enzyme cutting sites into MCS sequence. Then pEGFP-N1 plasmid and MCS sequence were cut with *NheI*, *NotI* enzymes, respectively. (A) The pIRES-double MCS vector was then constructed through molecular experiments. Mouse IL-18 and GM-CSF were then cloned into pIRES-DMCS using *EcoRI*, *XbaI* and *SacI*, *SacII* restriction Enzymes, respectively. (B) The pIRES-mGM-CSF, pIRES-mIL-18 and pIRES-mGM-CSF+IL-18 plasmids were validated. The results were showed in DNA electrophoresis.

**Figure S2** The mRNA expression of IL-18 and GM-CSF between irradiation and non-irradiation cells.

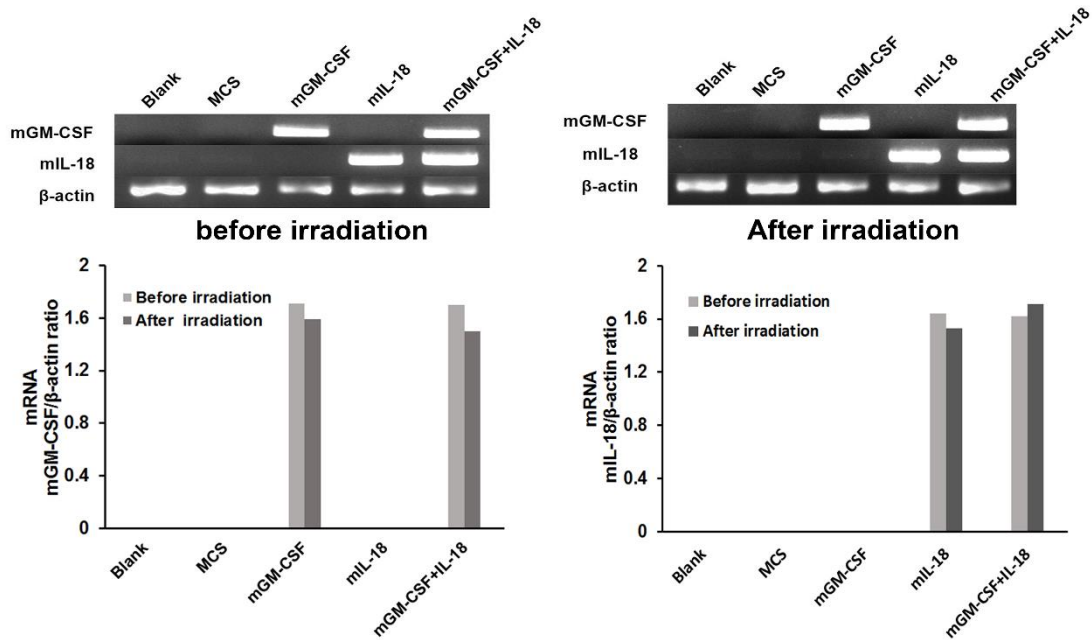

Supplement: 1471-2407-14-48-S1.pdf [file 1471-2407-14-48-S1.pdf]
